# Supplementary material for: Pre-Columbian zoonotic enteric parasites: An insight into Puerto Rican indigenous culture diets and life styles
Source: PLOS journal article supplement (doi:10.1371/journal.pone.0227810), 2020-01-30
Supplement: S9 (10.1371/journal.pone.0227810.s009) [file journal.pone.0227810.s009]

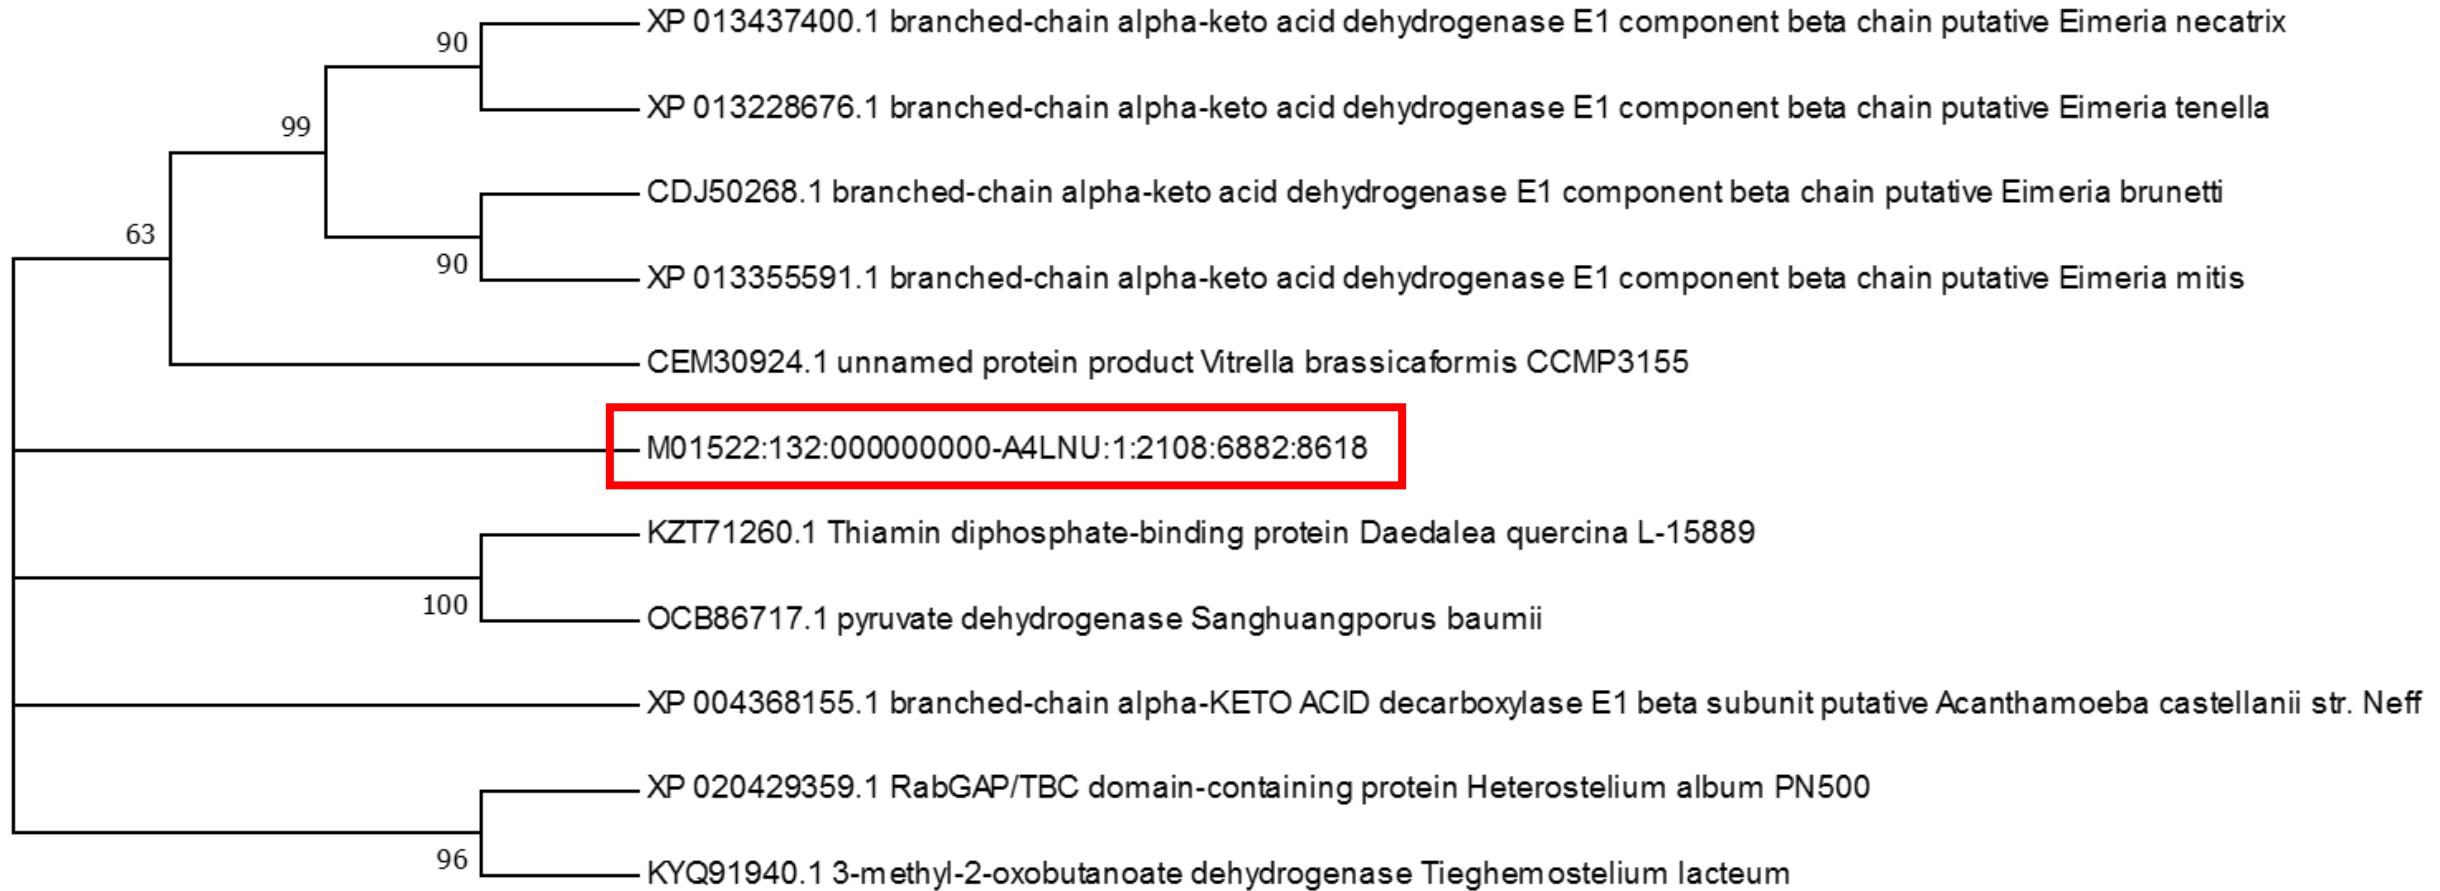

**S9 Fig. Molecular Phylogenetic analysis by Maximum Likelihood method (BlastX homology search of M01522:132:000000000-A4LNU:1:2108:6882:8618).** The evolutionary history was inferred by using the Maximum Likelihood method based on the Whelan And Goldman model. The bootstrap consensus tree inferred from 1000 replicates.
